# Supplementary material for: Long-term impact of changing childhood malnutrition on rotavirus diarrhoea: Two decades of adjusted association with climate and socio-demographic factors from urban Bangladesh
Source: PubMed Central journal article supplement (PMC5587254; doi:10.1371/journal.pone.0179418), 2017-09-06

**S 3 Fig.:** Cross-correlations of monthly proportion of rotavirus and underweight, stunting, wasting, monthly mean temperature, rainfall, sea level pressure and humidity

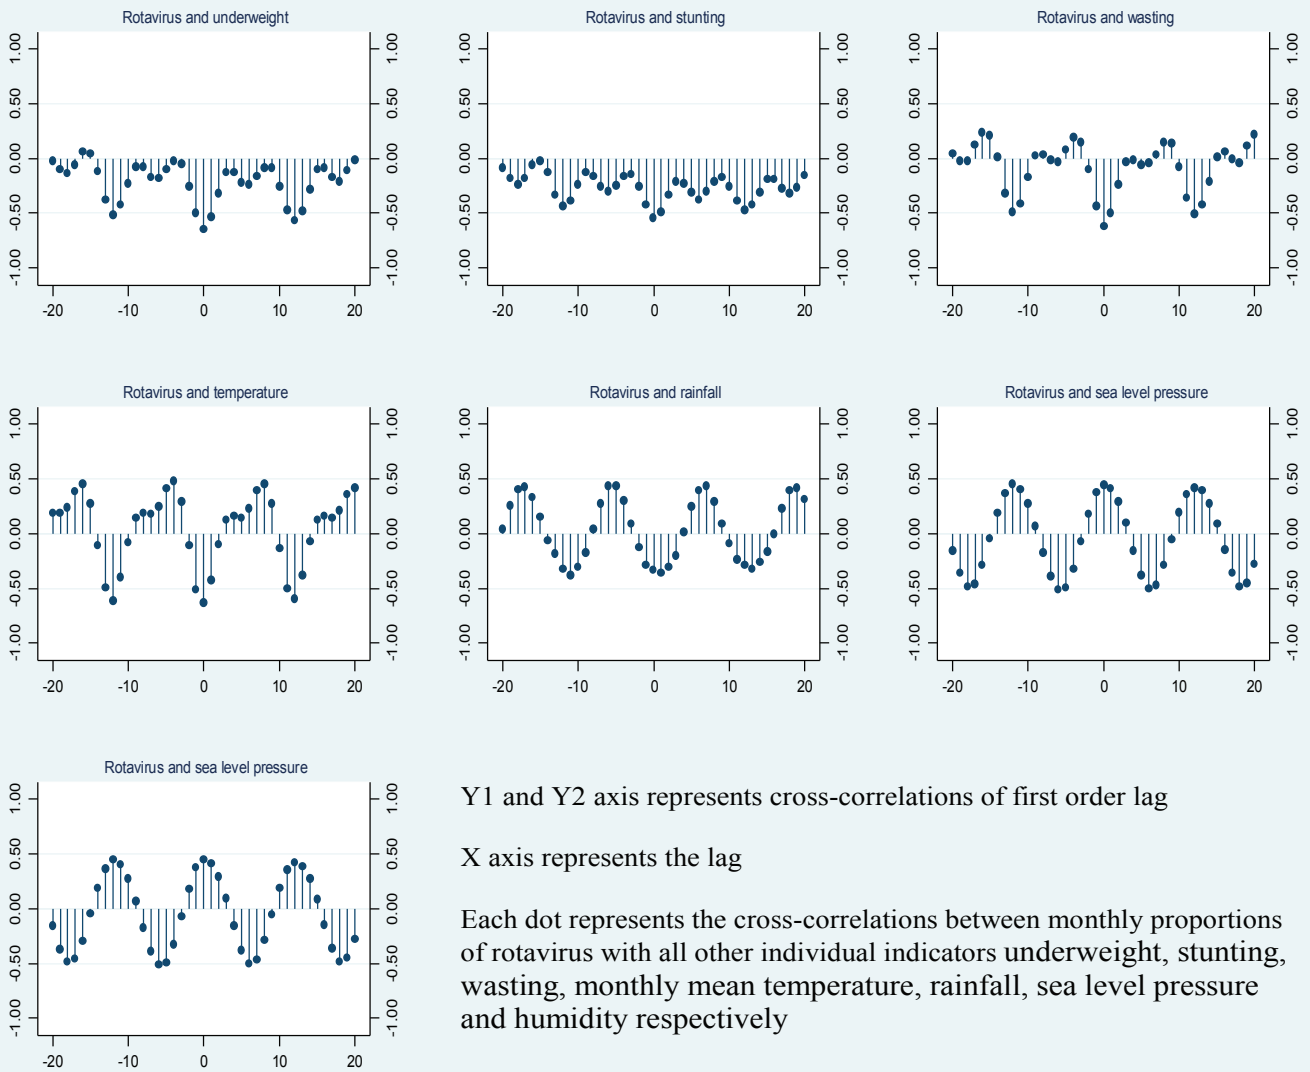

Supplement: pone.0179418.s009.pdf [file pone.0179418.s009.pdf]
